# Supplementary material for: Interleukin-6 blockade attenuates lung cancer tissue construction integrated by cancer stem cells
Source: Sci Rep. 2017 Sep 26;7:12317. doi: 10.1038/s41598-017-12017-y (PMC5615065; doi:10.1038/s41598-017-12017-y)

Supplementary data.

Title: Interleukin-6 blockade attenuates lung cancer tissue construction integrated by cancer stem cells.

Hiroyuki Ogawa<sup>1,2,3</sup>, Michiyo Koyanagi-Aoi<sup>1,2,4</sup>, Kyoko Otani<sup>5</sup>, Yoh Zen<sup>5</sup>, Yoshimasa Maniwa<sup>3</sup>, Takashi Aoi<sup>1,2,4</sup>

<sup>1</sup> Division of Advanced Medical Science, Graduate School of Science, Technology and Innovation, Kobe University.

<sup>2</sup> Department of iPS Cell Applications, Graduate School of Medicine, Kobe University

<sup>3</sup> Division of Thoracic Surgery, Graduate School of Medicine, Kobe University.

<sup>4</sup> Center for Human Resource Development for Regenerative Medicine, Kobe University Hospital.

<sup>5</sup> Department of Diagnostic Pathology, Graduate School of Medicine, Kobe University.

**Figure S1 Phenotypes of the parental A549, OSK-A549, OSK-A549-Colony and OSK-A549-SN cells.** A) The proliferation ability of OSK-A549 cells was decreased in comparison to the parental A549 and EGFP-A549 cells. B) Phase contrast microscopy of the spheres. Only OSK-A549 cells formed large numbers of spheres which were larger than 100  $\mu\text{m}$  in size (the arrows indicate representative spheres). C) The cell cycle was analyzed by flow cytometry based on anti-Ki67-PE and Hoechst33342 staining. D) The results of a cell cycle assay using a cell-clock mammalian cell cycle assay kit. The yellow, green, and dark blue cells represent the G0/G1-phase, the S-phase, late G2- and M-phase cells, respectively. E) The analysis of the expression of E-cadherin by flow cytometry. F) The comparison of the migration ability by a wound healing assay. Cellular images taken during scratching (upper panels) and 30 hours later (lower panels) are shown. G) Cellular images of the three cell lines obtained using the DLCGH method. H) The invasion area in DLCGH was analyzed using the ImageJ software program (n=3, \*\*P<0.01; Dunnett's test). I) Alcian blue-PAS staining of the spheres of the parental A549 and OSK-A549-Colony cells.

**Figure S2. The analysis of cellular motility and migration using a HolomonitorM4.** A) Eight cells were selected and color-coded at the beginning of the analysis and were tracked for 5 hours (upper panels). Spatial movement graphs for selected cells (the starting position was the center) are shown in lower panels. B) Cellular movement was categorized by

non-directional cellular motility and directional migration velocity. The cellular motility speed of each cell line is shown in the upper panels and the cell migration velocity is shown in the lower panels. Both were increased in the OSK-A549-SN cells.

**Figure S3. Co-culture of cancer cells, human umbilical vein endothelial cells (HUVECs) and mesenchymal stem cells (MSCs).** A) Phase contrast (upper panels), red fluorescence (middle panels) and merged images (lower panels) of the co-cultured organoids consisting of EGFP-labeled cancer cells, mCherry-labeled HUVECs and MSCs. B) The mean fluorescence intensity of mCherry in the organoids shown in A. (n=3, \*P<0.05; repeated measures ANOVA). C) The expression of CD31 was analyzed by immunohistochemistry to detect HUVEC in the organoids. D) Ki67 staining of the parental A549, OSK-A549-Colony cell-derived organoids and human lung cancer specimens. E) The proportion of Ki67-positive cells was decreased in the center of the OSK-A549-Colony cell-derived organoids. The cells located in the inner and outer halves of the spheres were counted as inner and outer cells, respectively (n=3, \*P<0.05; two-tailed paired *t*-test.).

**Figure S4. A gene expression analysis of the parental A549, OSK-A549-Colony and OSK-A549-SN cells by microarray.** A) A comparison of the expression of previously-reported candidate marker genes related to cancer stem cells. (n=3, Dunnett's

test.). B) A comparison of OCT3/4, SOX2, KLF4, and NANOG expression. . Microarray probes for OCT3/4 (A\_24\_P144601) and KLF4 (A\_23\_P32233) are located in the coding regions, and the probes for OCT3/4 (A\_23\_P59138), SOX2 (A\_33\_P3361067) and NANOG (A\_23\_P204640) are in the 3' untranslated region. (n=3, \*P<0.05, \*\*P<0.01 Dunnett's test.).

**Figure S5. The in situ hybridization of IL-6 in clinical samples (case 2, lesions 2, 3 in Table 1).** A,B) Computed tomography (CT) images (A) and pictures of the surgical specimens (B) of a 67-year-old male patient with pT3N1M0 pm1 KRAS mutation-positive lung adenocarcinoma. Images of the primary lesion are shown on the left and pulmonary metastasis (PM) is shown on the right. (C)-(E) Immunohistochemical staining of E-Cadherin (left panels) and the in situ hybridization of IL-6 (right panels) in the intratumoral region of the primary lesion (C) and the PM lesion (D), and around the primary lesion (E) of the tumor. C) In this case, most of IL-6 mRNA-positive cells were E-cadherin-negative mesenchymal cells (arrowheads); however, a small number of IL6-mRNA-positive epithelial cancer cells were also detected (circle). D) IL-6 mRNA-positive lung epithelial cancer cells were also found in the PM lesion. E) The normal lung epithelial cells located immediately around the tumor were also IL-6 mRNA-positive (arrow).

**Table S1. The GO analysis of genes in the OSK-A549-Colony cells that were significantly upregulated in comparison to the parental A549 and OSK-A549-SN cells.** The genes were selected using a volcano plot. OSK-A549-Colony cells vs. OSK-A549-SN cells; volcano plot,

P<0.03; Fold change, > 2.0; after the analysis of OSK-A549-Colony cells vs. the parental A549 cells; volcano plot, P<0.03; Fold change, > 2.0.

| GO ID | GO ACCESSION | GO Term                                 | p-value  | corrected p-value | Count in selection | % Count in Selection | Count in total | % Count in total |
|-------|--------------|-----------------------------------------|----------|-------------------|--------------------|----------------------|----------------|------------------|
| 947   | GO:0001568   | Blood vessel development                | 2.07E-07 | 7.40E-04          | 8                  | 28.57143             | 426            | 2.395816         |
| 1259  | GO:0001944   | Vasculature development                 | 2.94E-07 | 7.40E-04          | 8                  | 28.57143             | 446            | 2.508295         |
| 4829  | GO:0006690   | Eicosanoid metabolic process            | 2.66E-07 | 7.40E-04          | 5                  | 17.85714             | 90             | 0.506158         |
| 20244 | GO:0043207   | Response to external biotic stimulus    | 3.78E-07 | 7.40E-04          | 9                  | 32.14286             | 644            | 3.621844         |
| 27087 | GO:0051707   | Response to other organism              | 3.78E-07 | 7.40E-04          | 9                  | 32.14286             | 644            | 3.621844         |
| 32341 | GO:0072358   | Cardiovascular system development       | 9.50E-08 | 7.40E-04          | 10                 | 35.71429             | 738            | 4.150498         |
| 32342 | GO:0072359   | Circulatory system development          | 9.50E-08 | 7.40E-04          | 10                 | 35.71429             | 738            | 4.150498         |
| 36724 | GO:1901568   | Fatty acid derivative metabolic process | 2.66E-07 | 7.40E-04          | 5                  | 17.85714             | 90             | 0.506158         |
| 5029  | GO:0006950   | Response to stress                      | 5.08E-07 | 7.79E-04          | 17                 | 60.71429             | 3167           | 17.81115         |
| 6863  | GO:0009607   | Response to biotic stimulus             | 5.47E-07 | 7.79E-04          | 9                  | 32.14286             | 673            | 3.784939         |

Figure S1

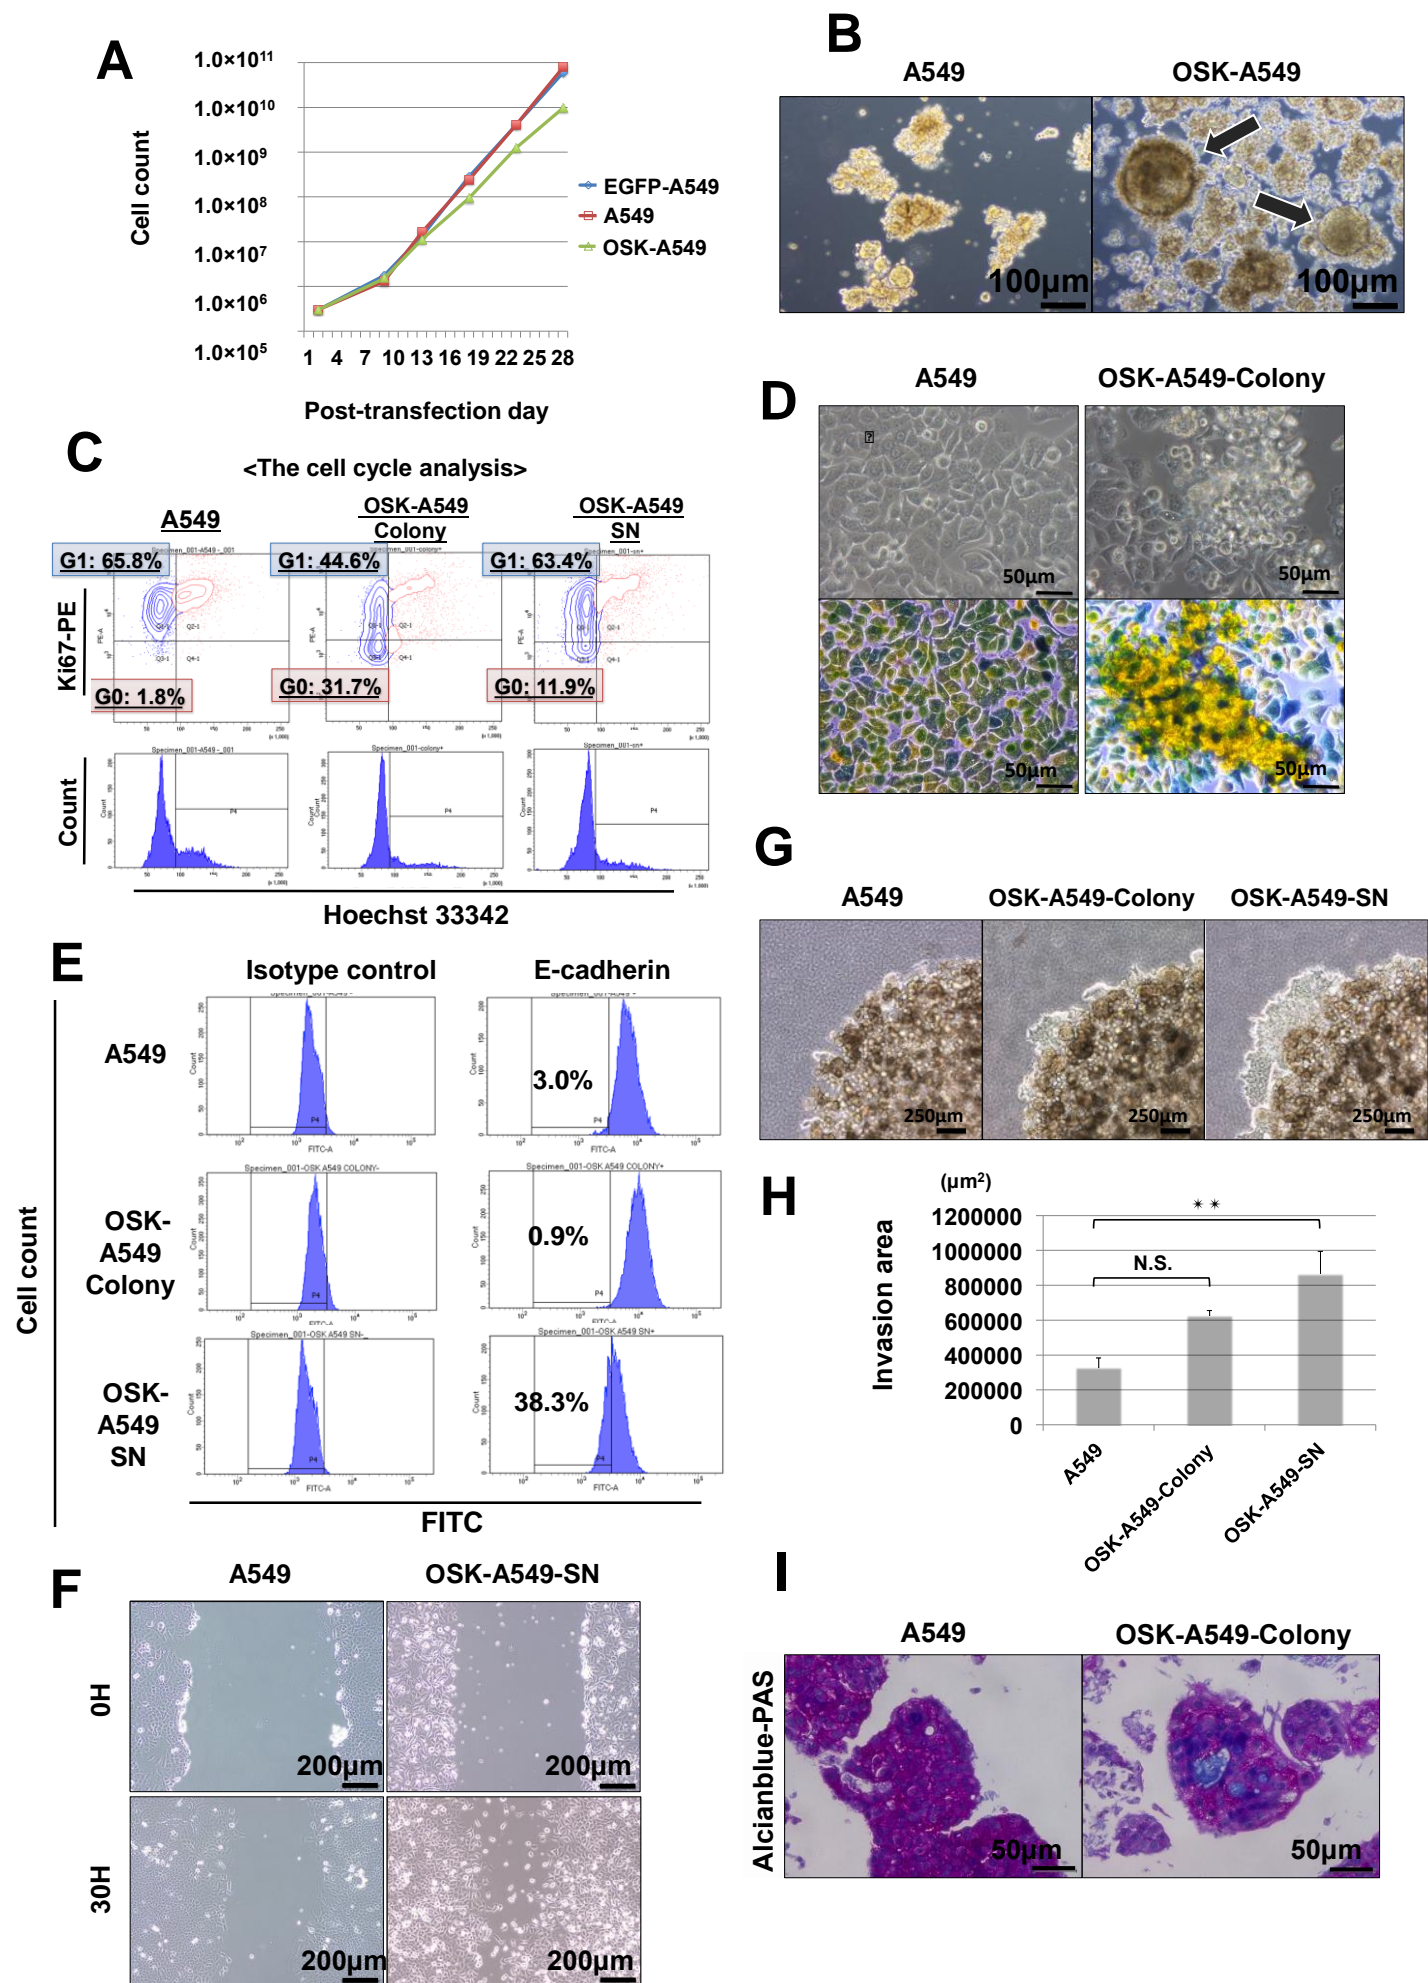

Figure S2

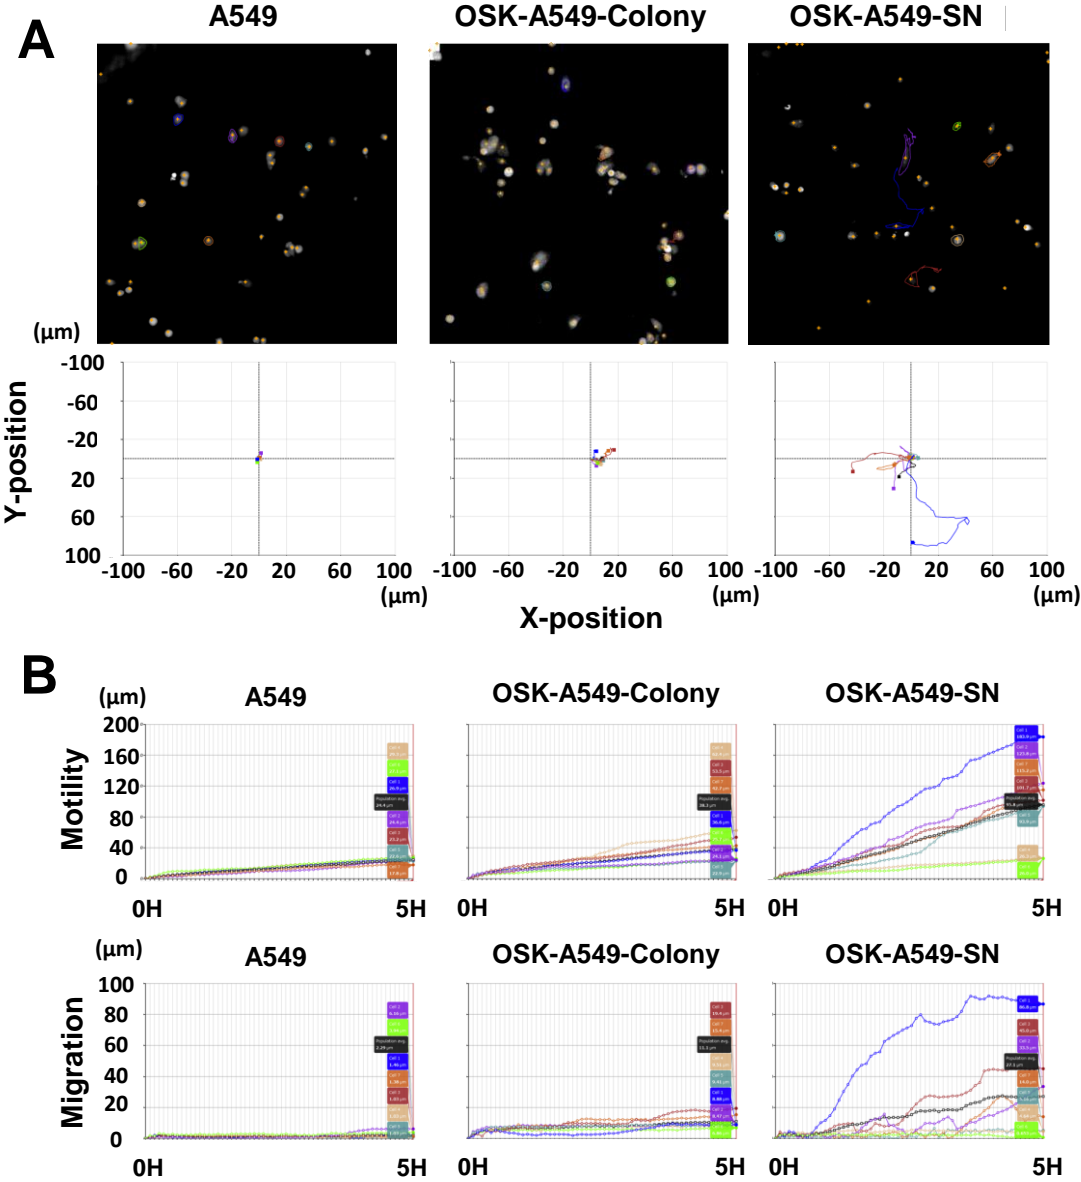

Figure S3

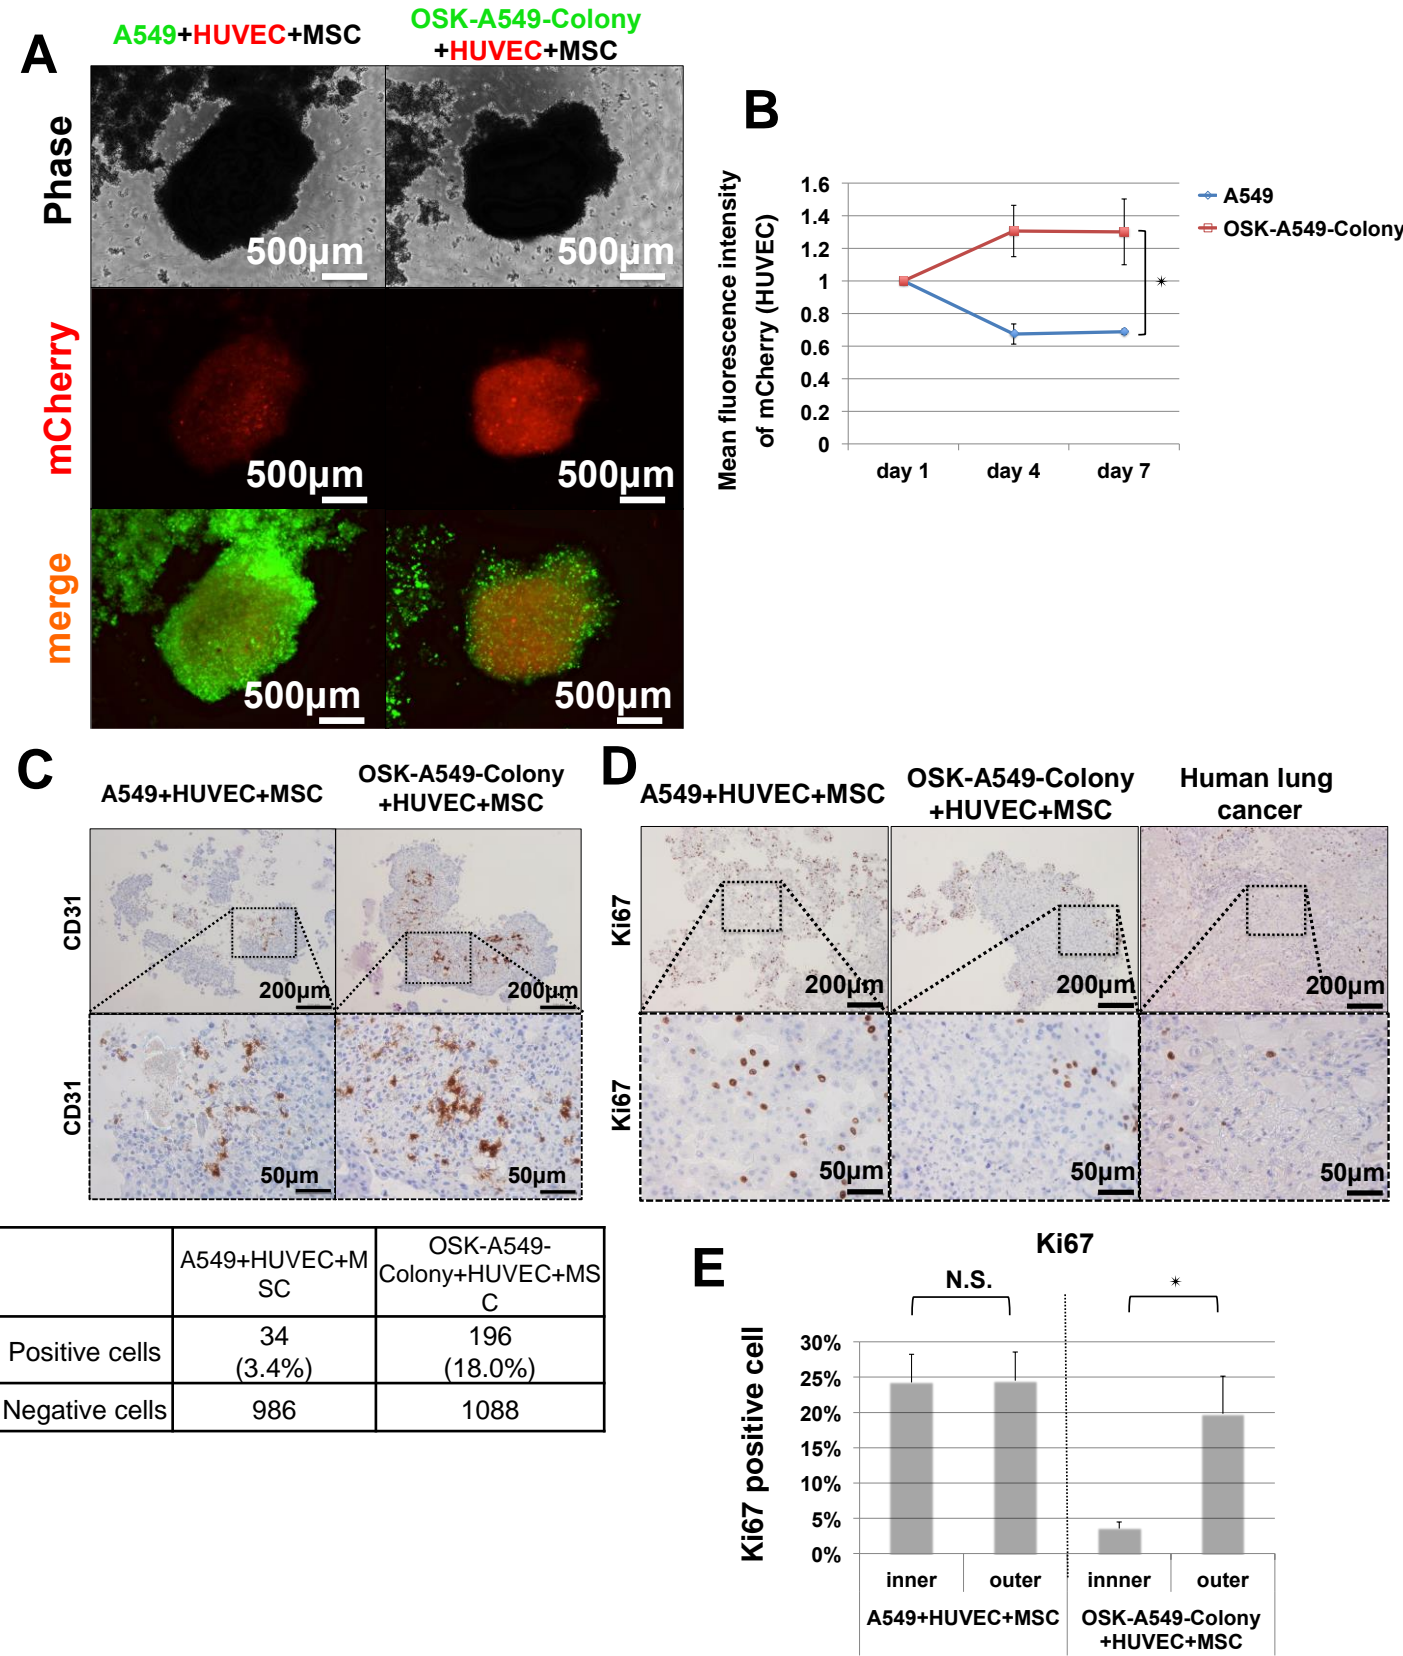

Figure S4

A

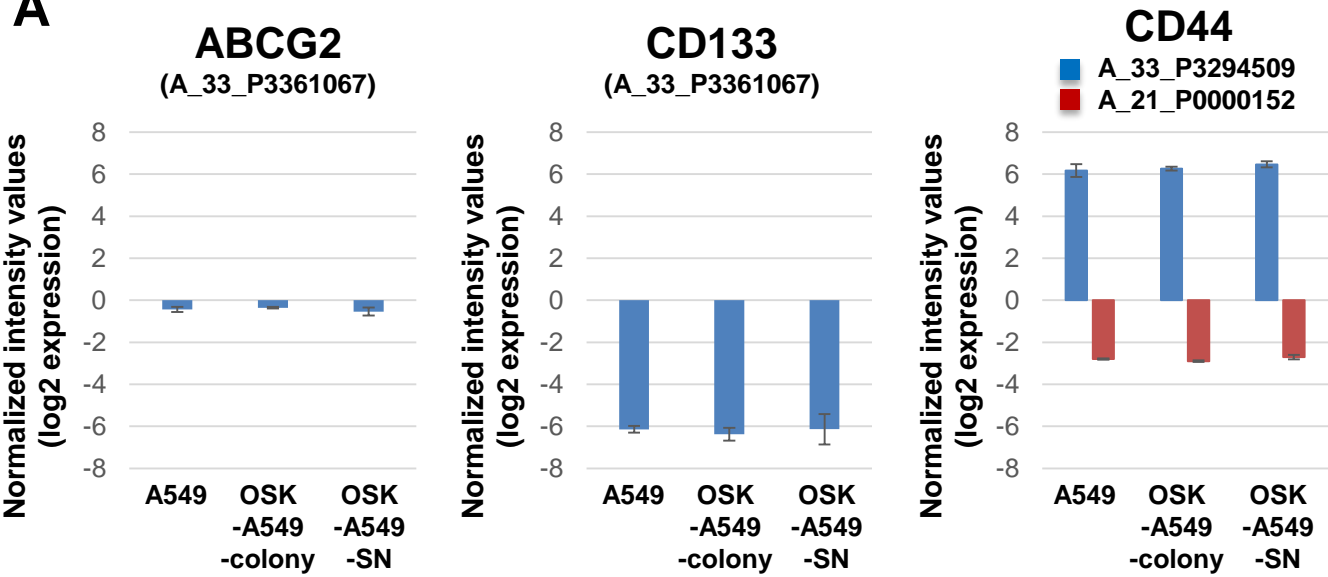

B

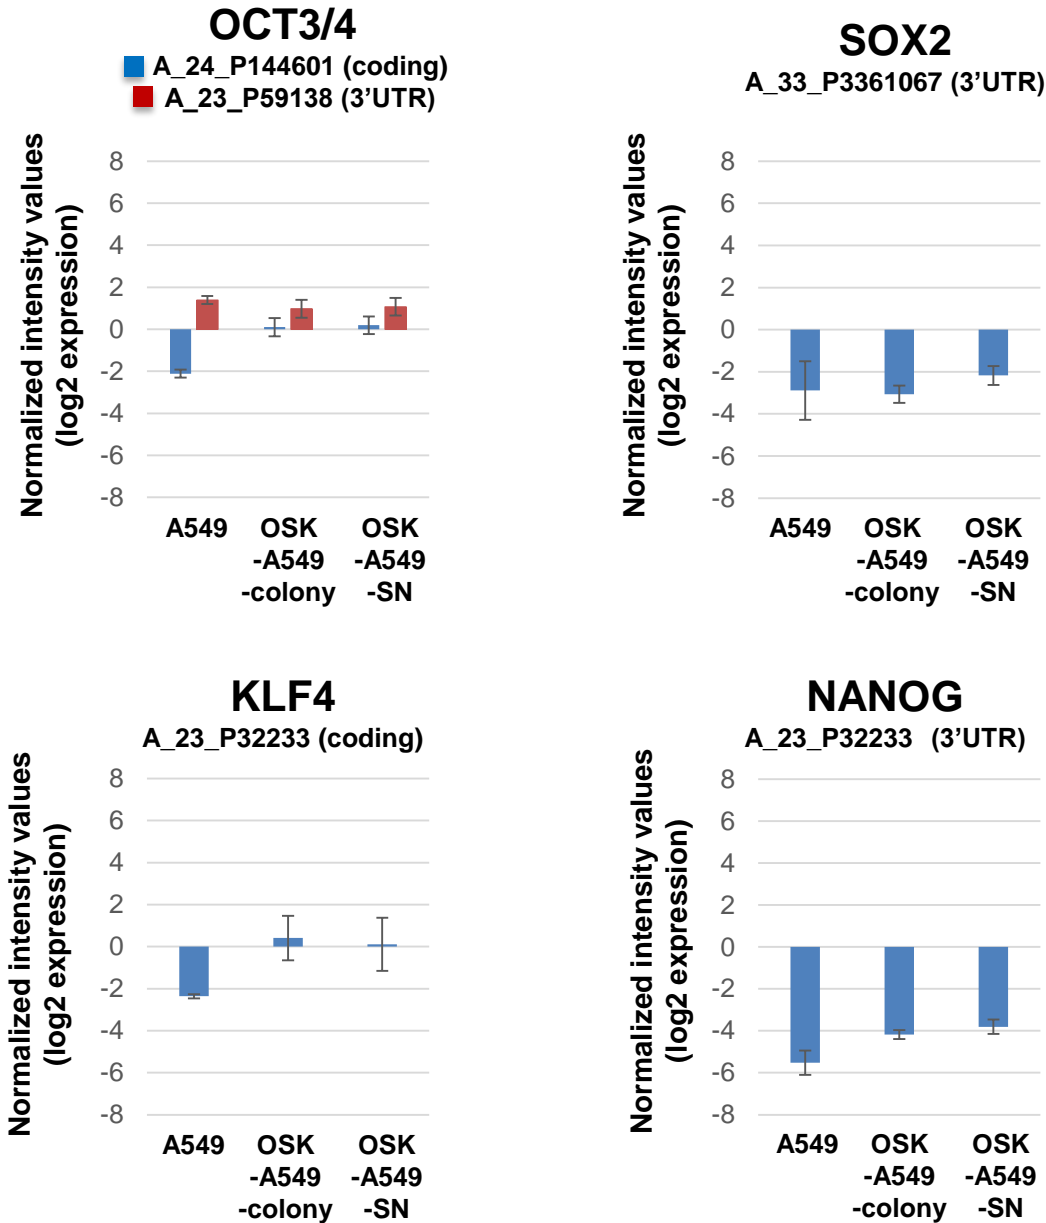

Figure S5

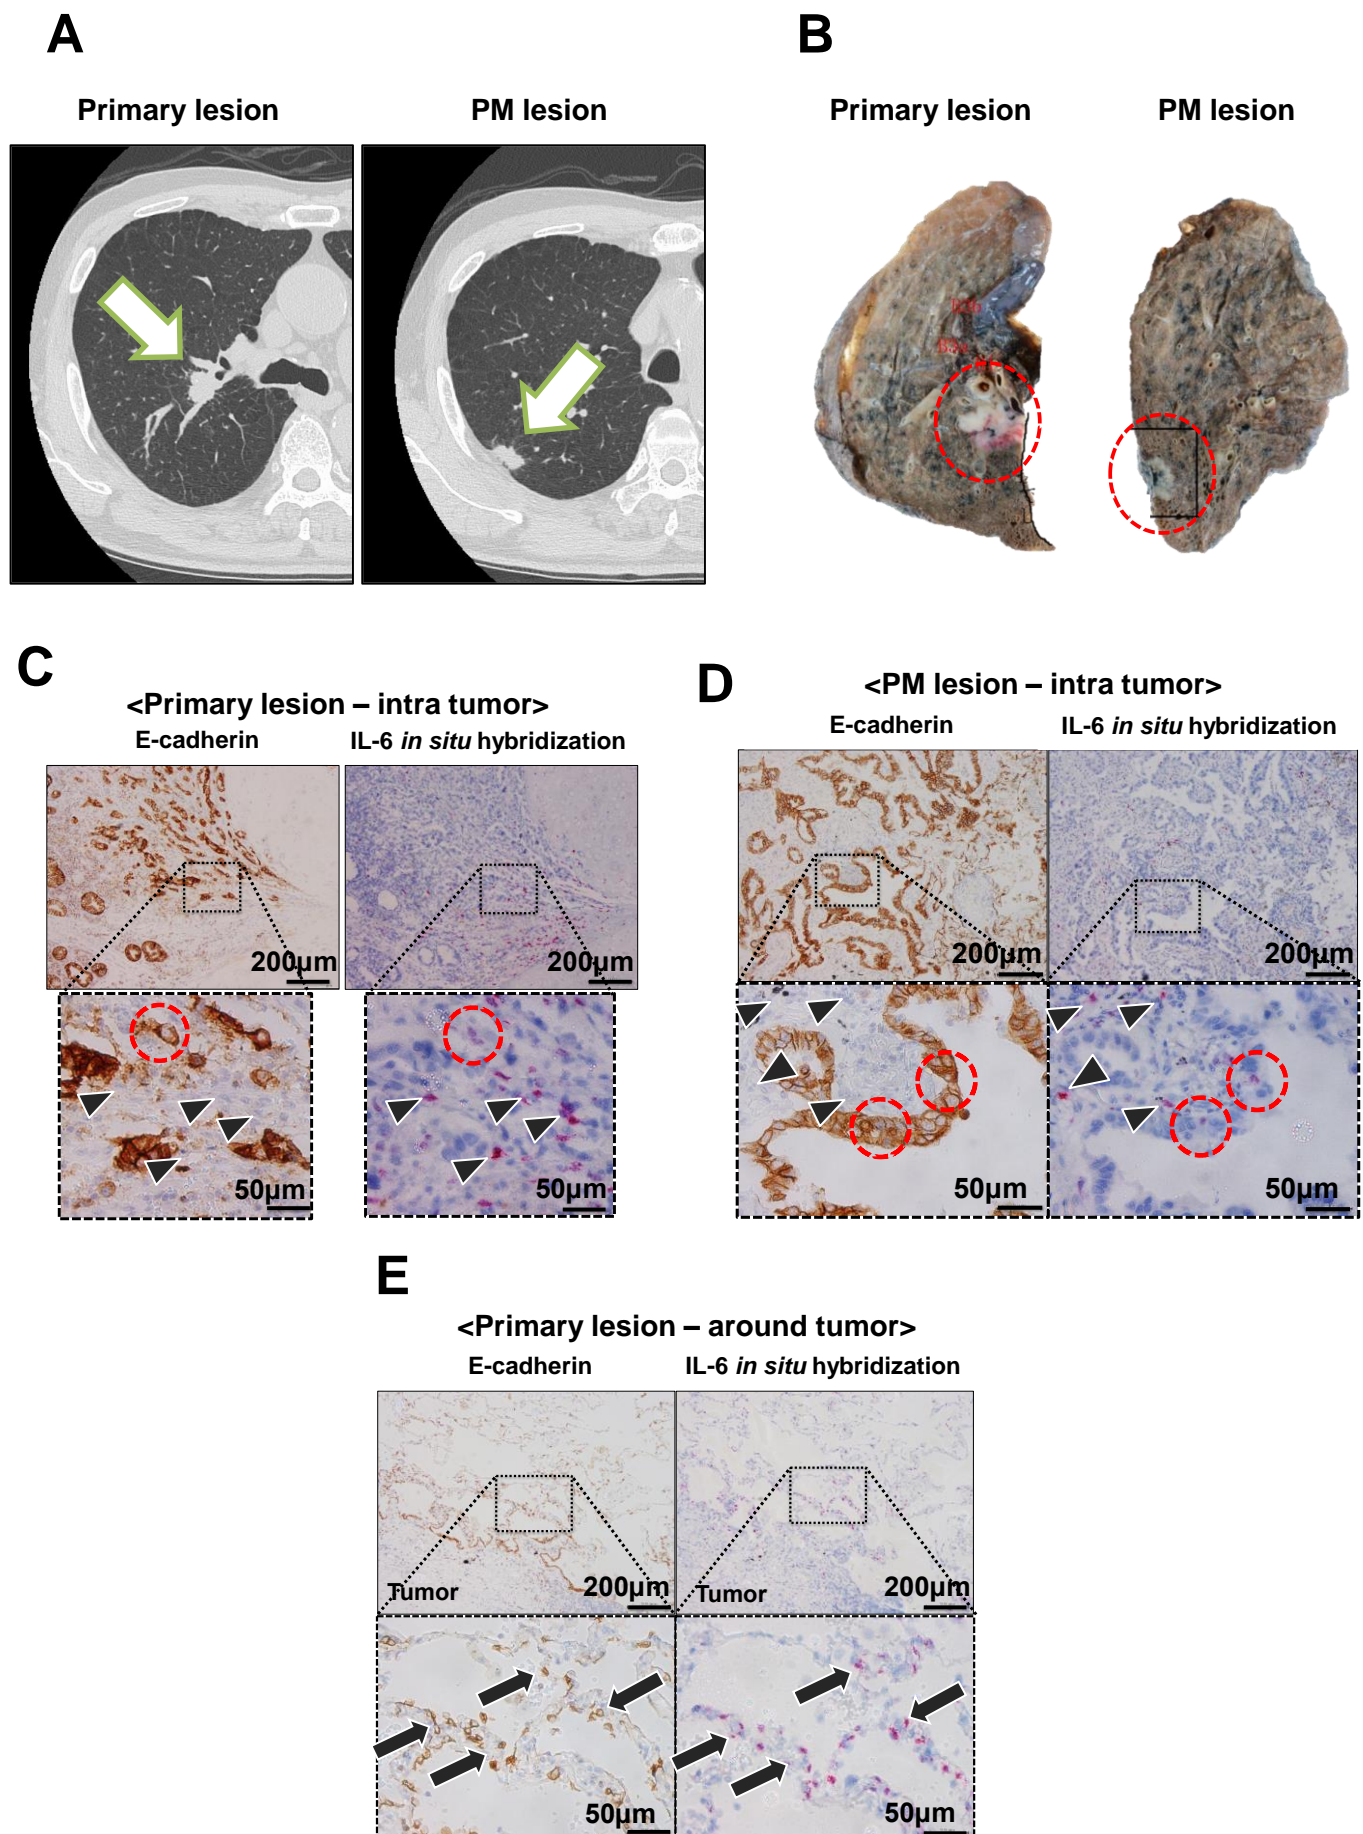

Supplement: Supplementary file 1 — Supplementary infornation [file 41598_2017_12017_MOESM1_ESM.pdf]
